# Supplementary material
Source: PubMed Central journal article supplement (PMC4800274)
Supplement: Supp_Fig2.pdf [file Supp_Fig2.pdf]

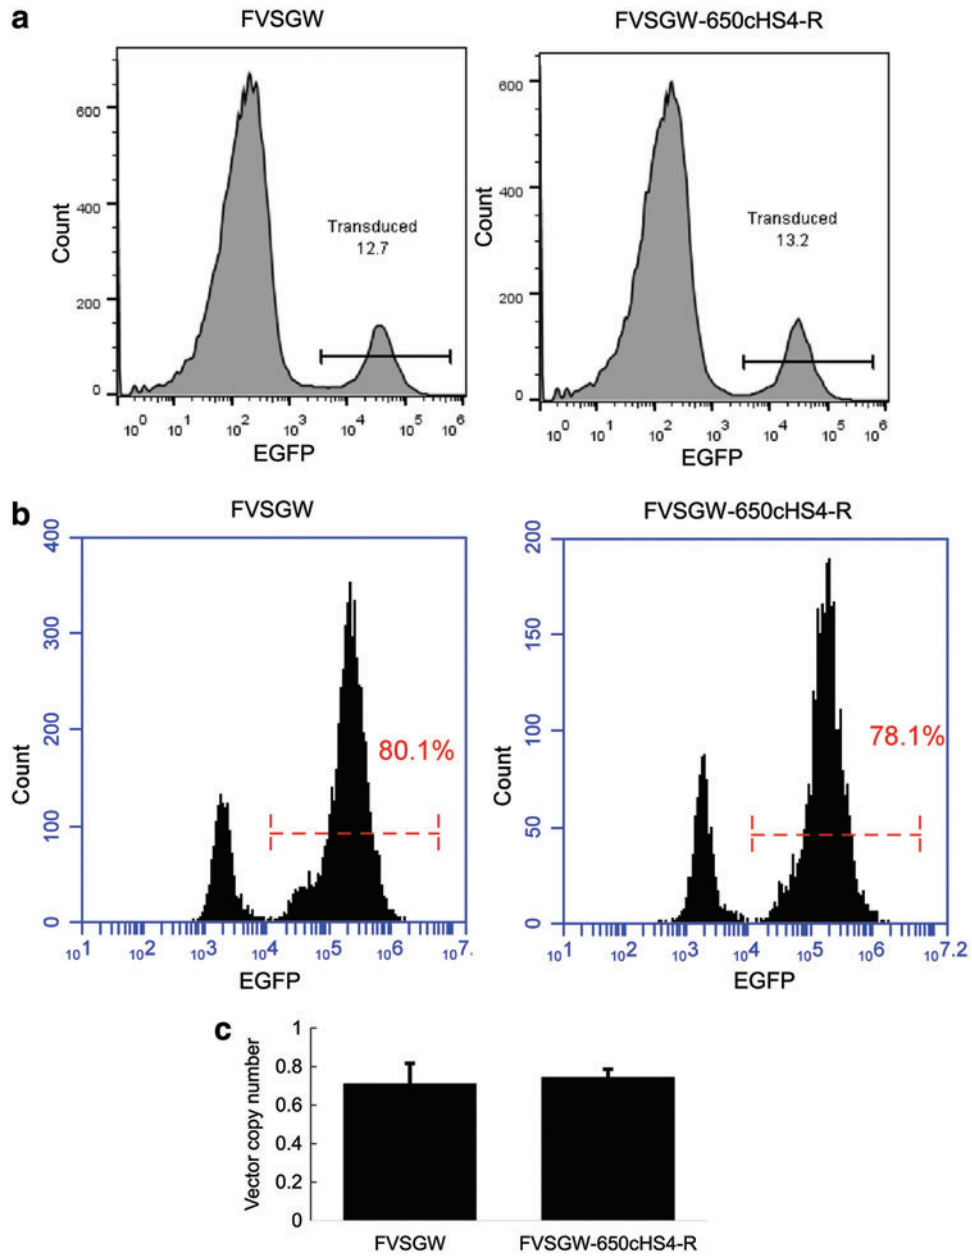

**Supplementary Figure S2.** Transduction of CD34<sup>+</sup> cord blood cells 5 days after vector exposure. Cells were transduced at an MOI of 10 with either FV or FV-650cHS4-R. On day 5 cells were sorted for EGFP expression and then DNA was harvested, and cells were placed in culture for 5 days before final (day 10) DNA harvest. **(a)** Representative histograms of the percent transduction on day 5 before sorting. **(b)** Histograms of EGFP expression after sorting. **(c)** Relative vector copy number within DNA extract from flow-sorted cells.  $p=0.67$ .
