# Supplementary material
Source: PubMed Central journal article supplement (PMC4800274)
Supplement: Supp_Fig3.pdf [file Supp_Fig3.pdf]

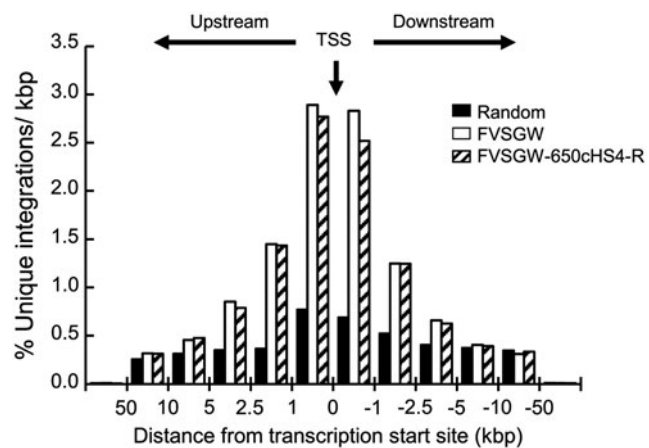

**Supplementary Figure S3.** Integration profile of FV and insulated FV vectors in transduced human cord blood CD34<sup>+</sup> cells. Shown are the positions of unique FV and insulated FV vector integrations in transduced human cord blood cells relative to RefSeq gene transcription start sites (TSS) 5 days after vector exposure.

---
