# Supplementary material
Source: PubMed Central journal article supplement (PMC4800274)
Supplement: Supp_Table1.pdf [file Supp_Table1.pdf]

## Supplementary Data

**Supplementary Table S1.** *Fidelity of insulator transfer to foamy viral vector proviruses*

|                               | <i>FV no insulator</i> | <i>FV 650cHS4 F</i> | <i>FV 650cHS4 R</i> | <i>FV 12xCTCF F</i> | <i>FV 12xCTCF R</i> | <i>FV 7xCTF/NF1 F</i> | <i>FV 7xCTF/NF1 R</i> |
|-------------------------------|------------------------|---------------------|---------------------|---------------------|---------------------|-----------------------|-----------------------|
| Captured proviruses           | 41                     | 36                  | 37                  | 45                  | 37                  | 40                    | 52                    |
| Complete 5' LTR               | 41                     | 36                  | 37                  | 4                   | 32                  | 40                    | 52                    |
| Partial insulator in 5' LTR   | NA                     | 0                   | 0                   | 41                  | 4                   | 0                     | 0                     |
| Complete 3' LTR               | 41                     | 36                  | 37                  | 4                   | 33                  | 40                    | 52                    |
| Partial insulator in 3' LTR   | NA                     | 0                   | 0                   | 41                  | 3                   | 0                     | 0                     |
| 5' LTR identical to 3' LTR    | 41                     | 36                  | 37                  | 45                  | 36                  | 40                    | 52                    |
| Percent fidelity <sup>a</sup> | 100%                   | 100%                | 100%                | 9%                  | 86%                 | 100%                  | 100%                  |

<sup>a</sup>*Fidelity* refers to the percentage of captured proviruses with complete insulators in both the 5' and 3' LTRs. F, forward orientation; FV, foamy virus; LTR, long terminal repeat; NA, not applicable; R, reverse orientation.
