# Supplementary material
Source: PubMed Central journal article supplement (PMC4800274)
Supplement: Supp_Table2.pdf [file Supp_Table2.pdf]

**Supplementary Table S2. Distribution of foamy viral and insulated FV vector integration sites in transduced human cord blood**

|            | n <sup>a</sup> | Total integrations (%) |                     |                                 | Integrations in or near proto-oncogenes (%) |                     |
|------------|----------------|------------------------|---------------------|---------------------------------|---------------------------------------------|---------------------|
|            |                | In genes               | Within 50 kb of TSS | In DNase hypersensitivity sites | In proto-oncogenes                          | Within 50 kb of TSS |
| Random     | 10,000         | 44.74                  | 44.40               | 1.01                            | 8.59                                        | 6.51                |
| Day 5      |                |                        |                     |                                 |                                             |                     |
| FV-control | 9,765          | 44.12                  | 59.90               | 3.37                            | 7.76                                        | 10.04               |
| FV-cHS4-R  | 4,764          | 43.65 <sup>b</sup>     | 60.26 <sup>b</sup>  | 2.94 <sup>b</sup>               | 7.54 <sup>b</sup>                           | 10.85 <sup>b</sup>  |
| Day 10     |                |                        |                     |                                 |                                             |                     |
| FV-control | 13,120         | 44.34                  | 59.49               | 2.80                            | 7.64                                        | 9.96                |
| FV-cHS4-R  | 5,976          | 43.41 <sup>b</sup>     | 59.11 <sup>b</sup>  | 2.76 <sup>b</sup>               | 7.65 <sup>b</sup>                           | 10.11 <sup>b</sup>  |

<sup>a</sup>n, the total number of unique integrations captured.

<sup>b</sup> $\chi^2$  analysis showed no significant difference compared with uninsulated control.

FV, foamy virus; TSS, transcription start site.
